# Supplementary material for: The ambruticins and jerangolids – chemistry, biology and chemoenzymatic synthesis of potent antifungal drug candidates
Source: Royal Society of Chemistry journal article supplement (doi:10.1039/d0np00012d), 2020-01-01
Supplement: d0np00012d12.pdf [file d0np00012d12.pdf]

R= saturated, unsaturated and branched alkyl chains ( $>C_9$ )
