# Supplementary figures and images for: The ambruticins and jerangolids – chemistry, biology and chemoenzymatic synthesis of potent antifungal drug candidates
Source: Royal Society of Chemistry journal article supplement (doi:10.1039/d0np00012d), 2020-01-01

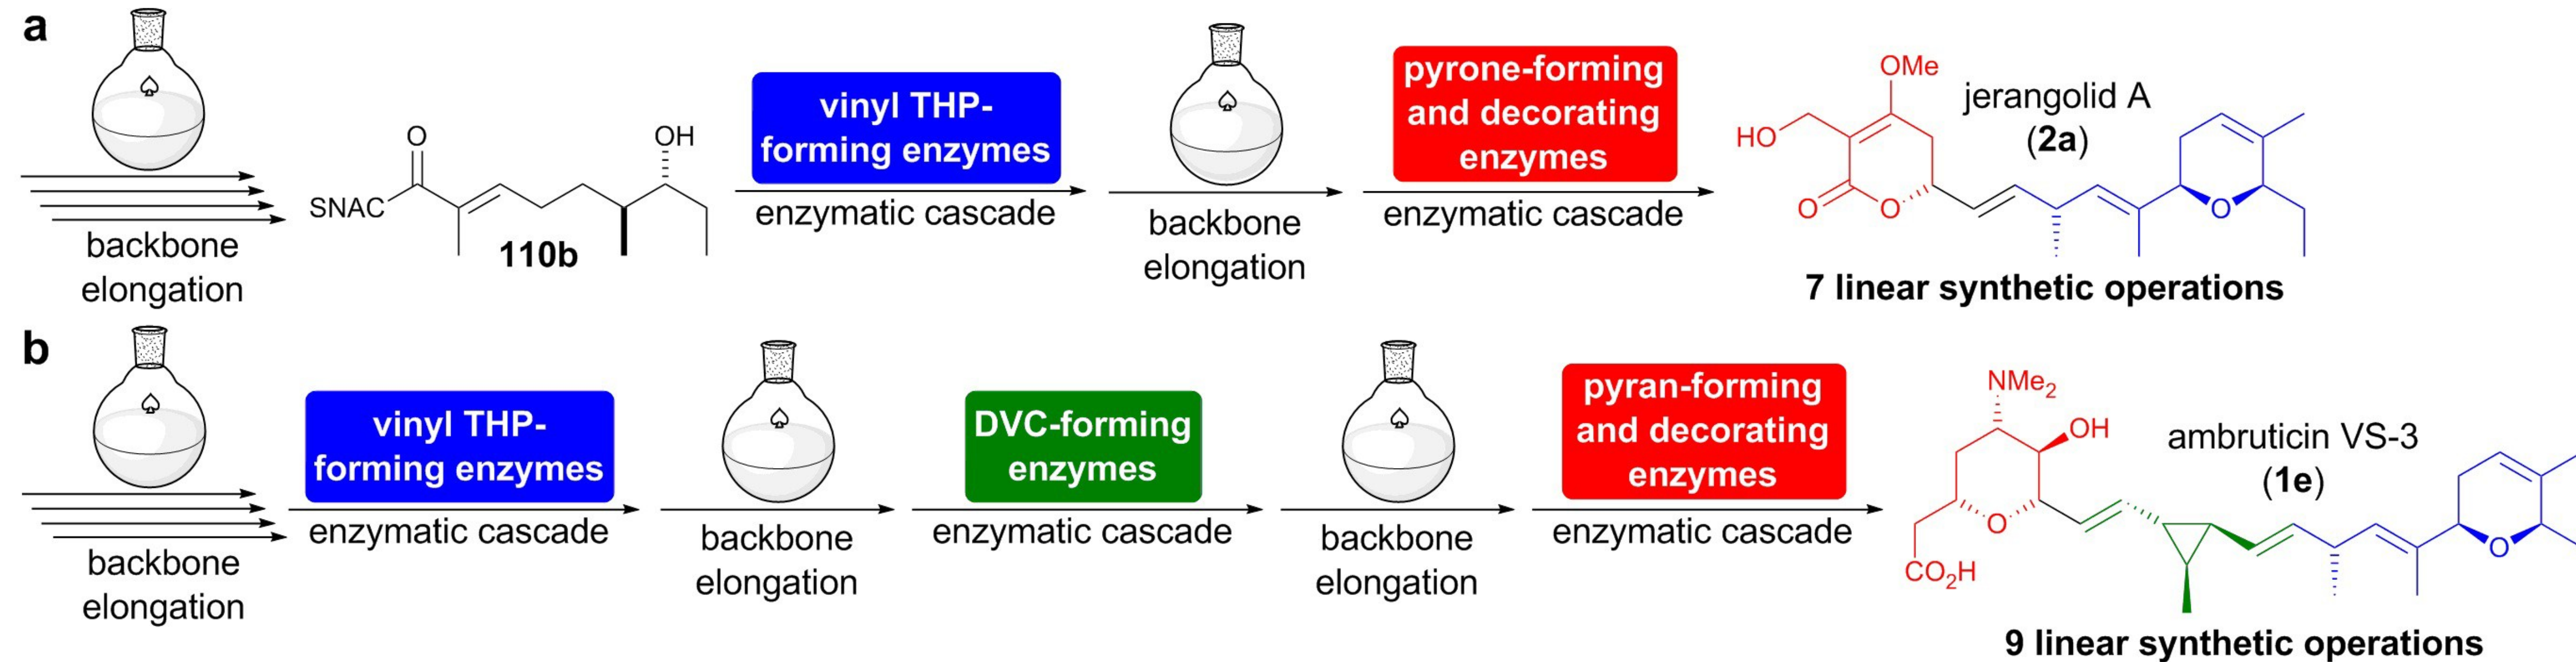

Supplement: d0np00012d13.pdf [file d0np00012d13.pdf]

## Derived from ambruticin S

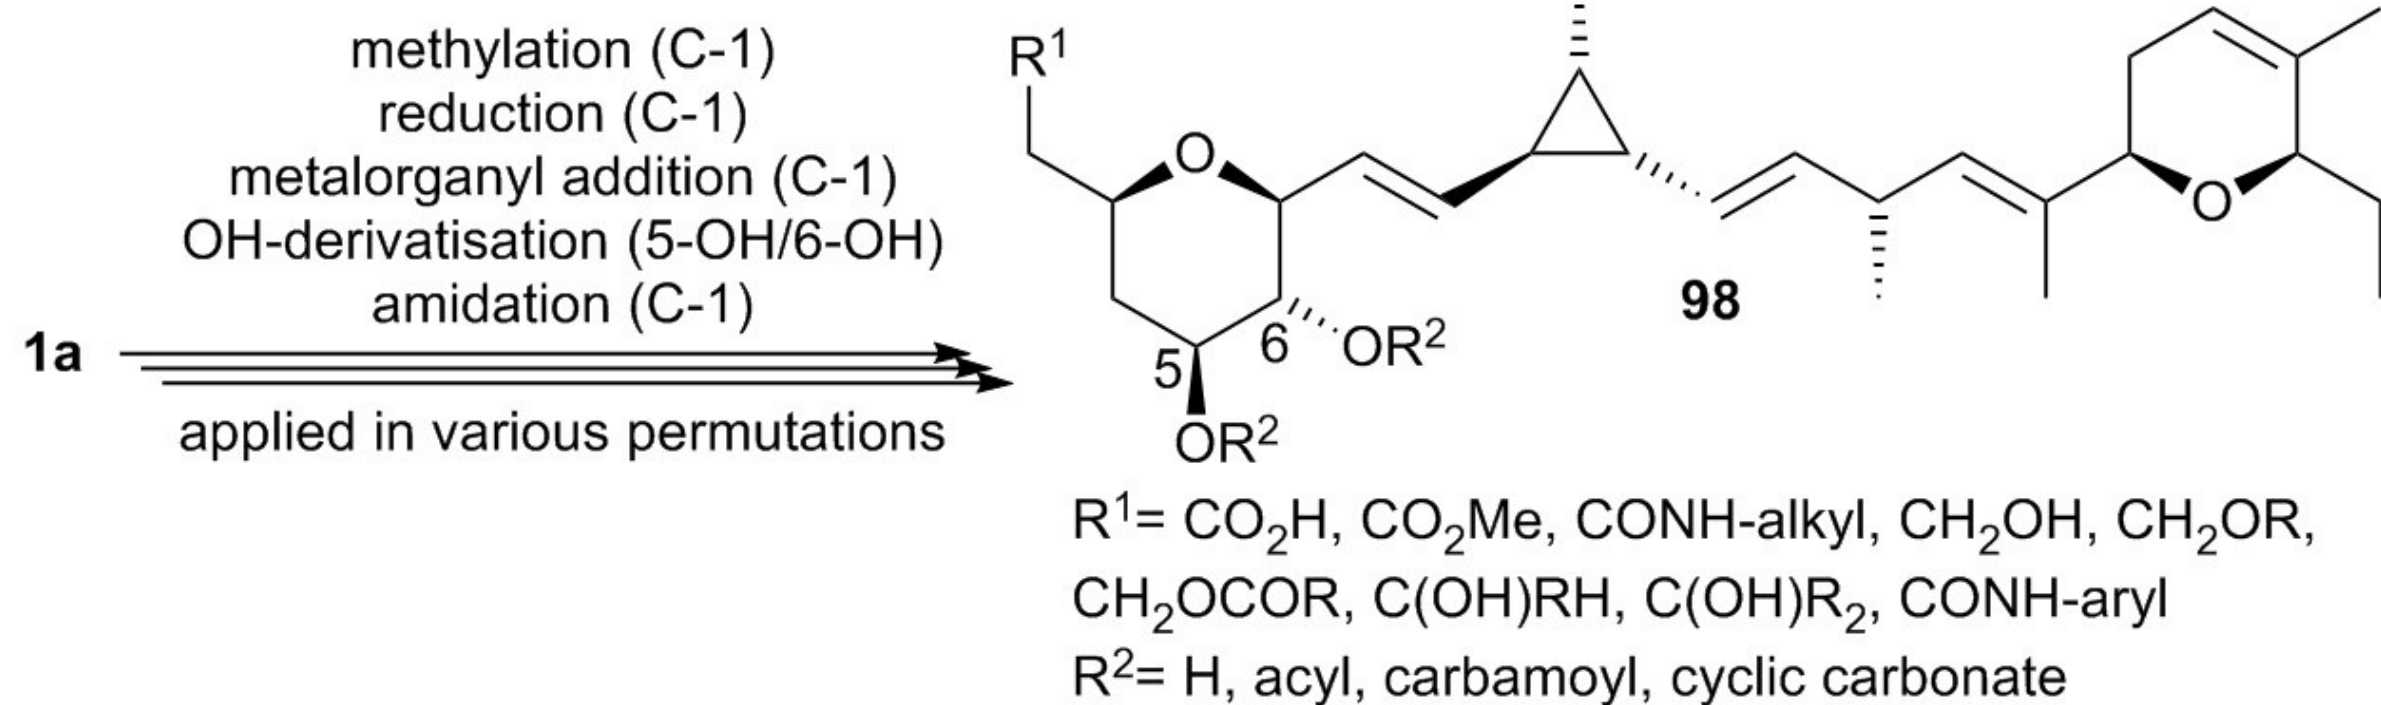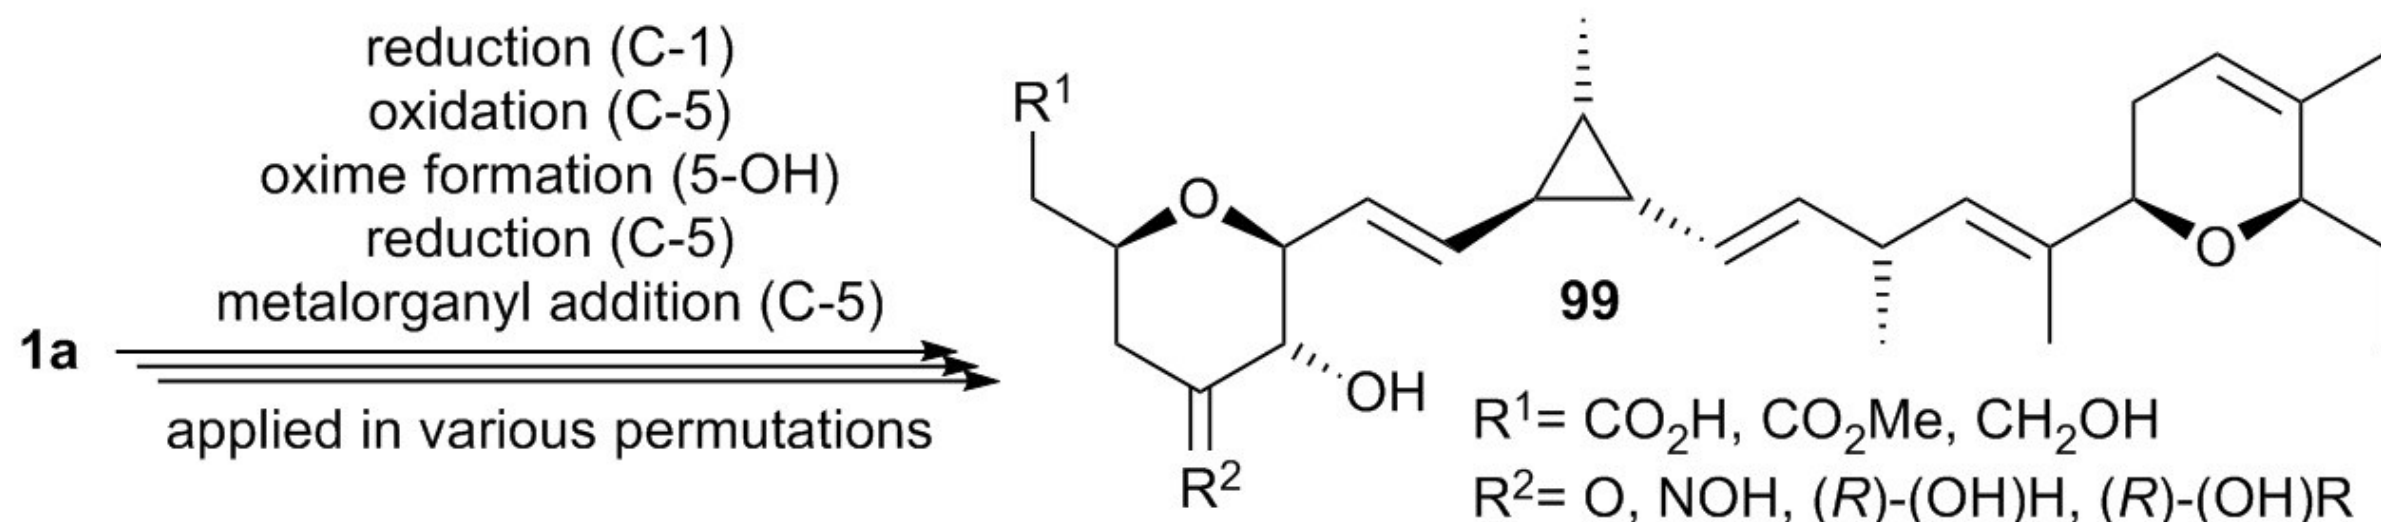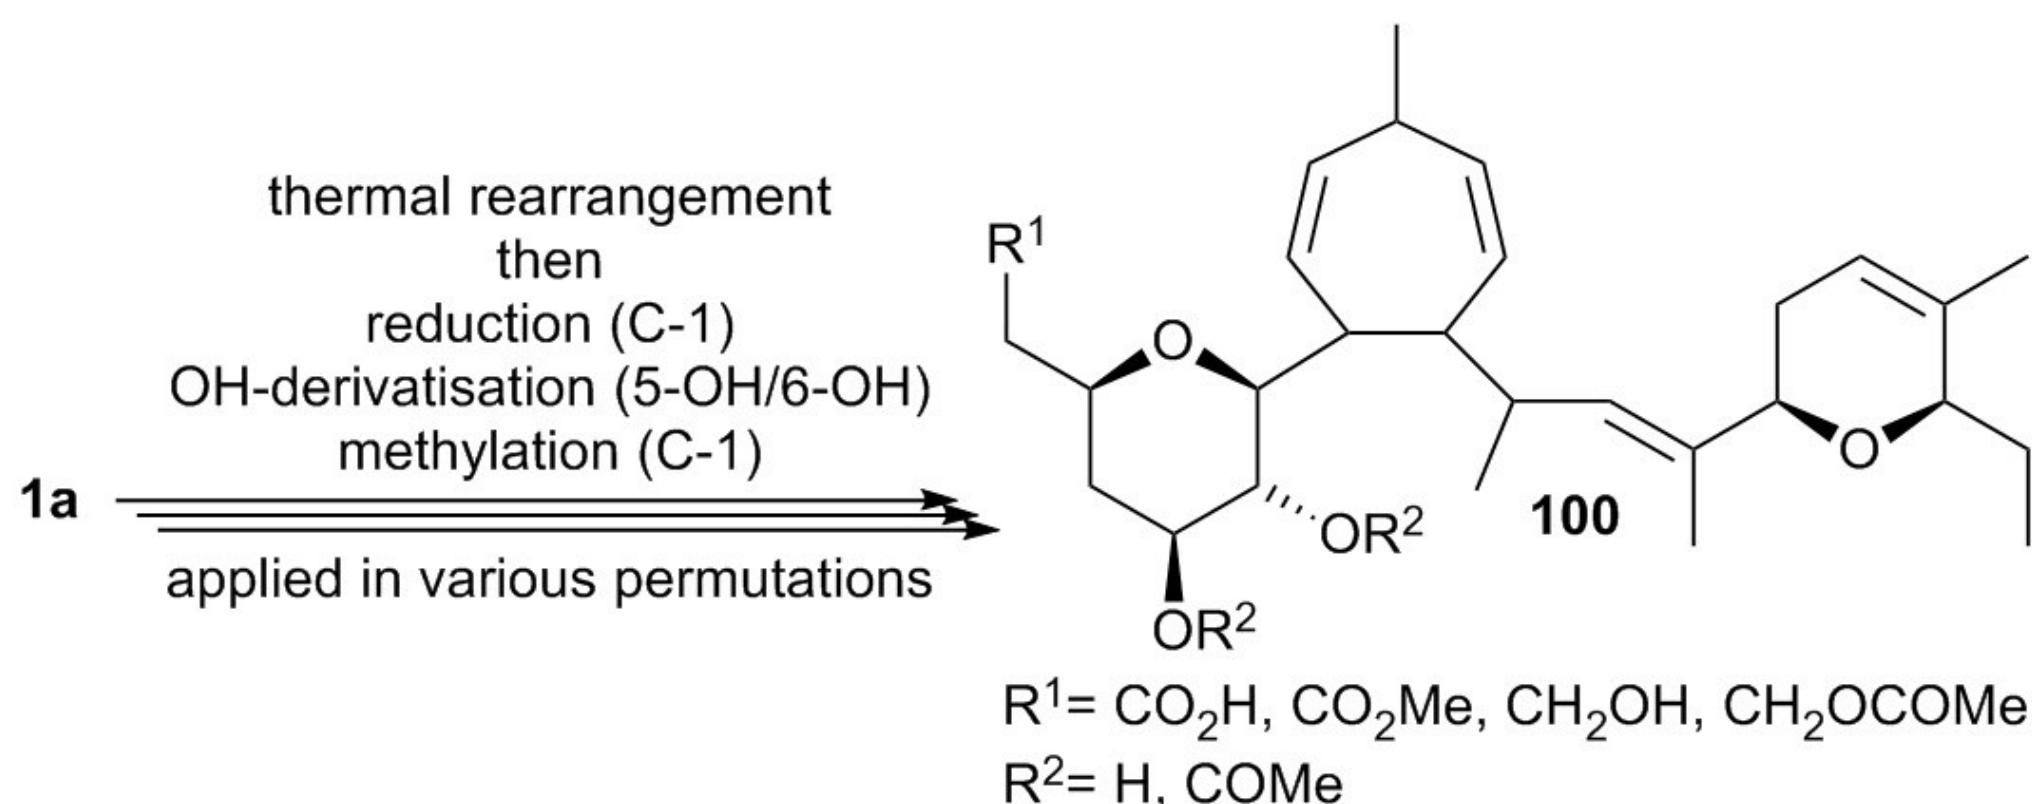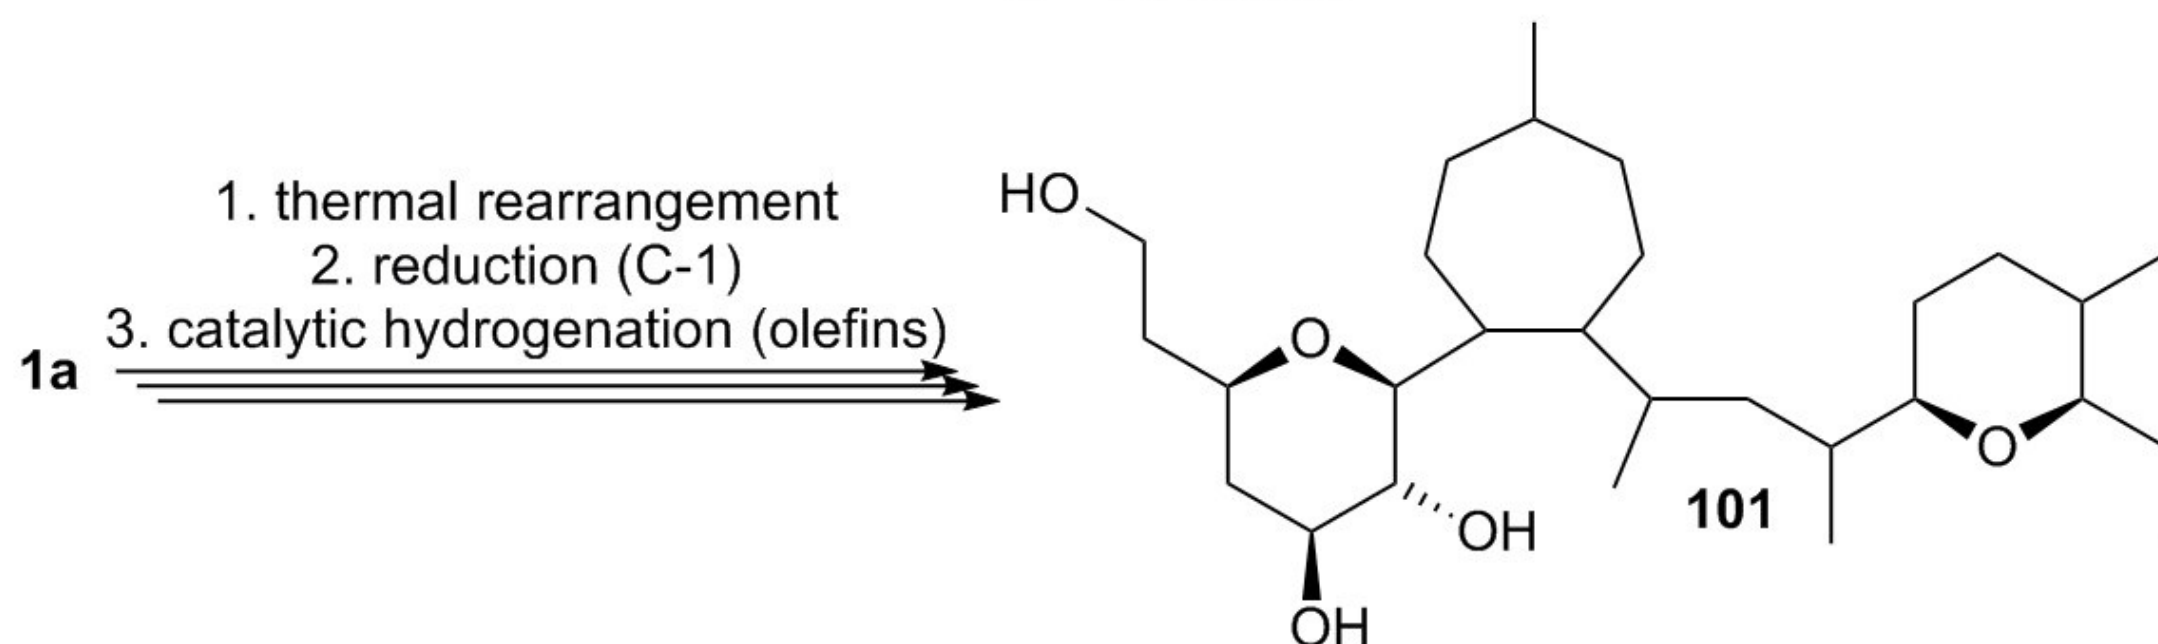

## Derived from the ambruticin VS series

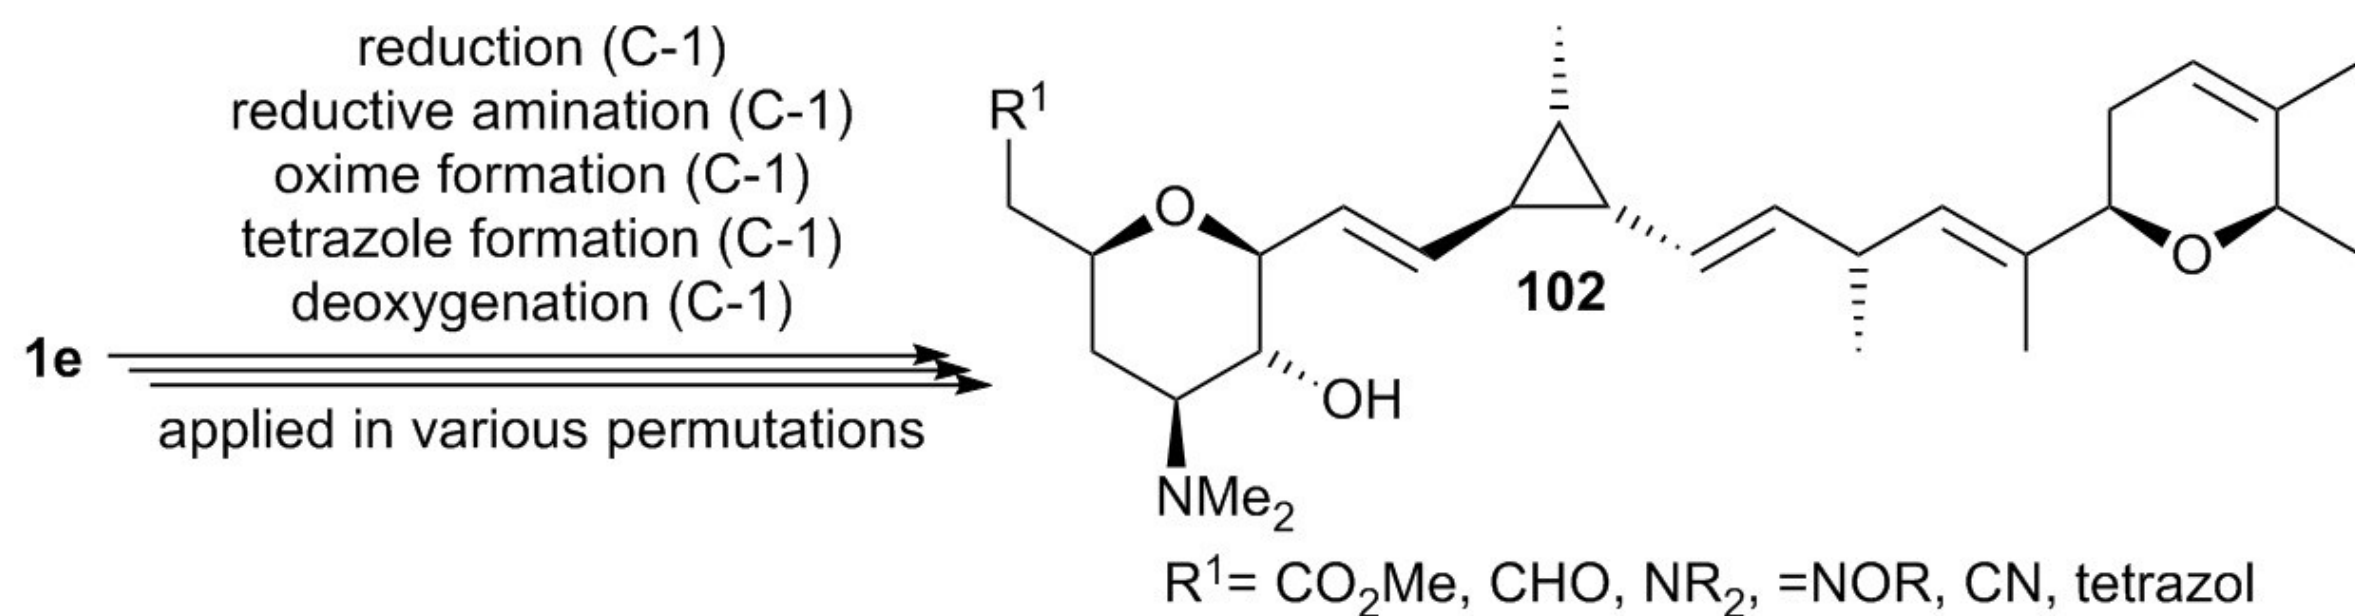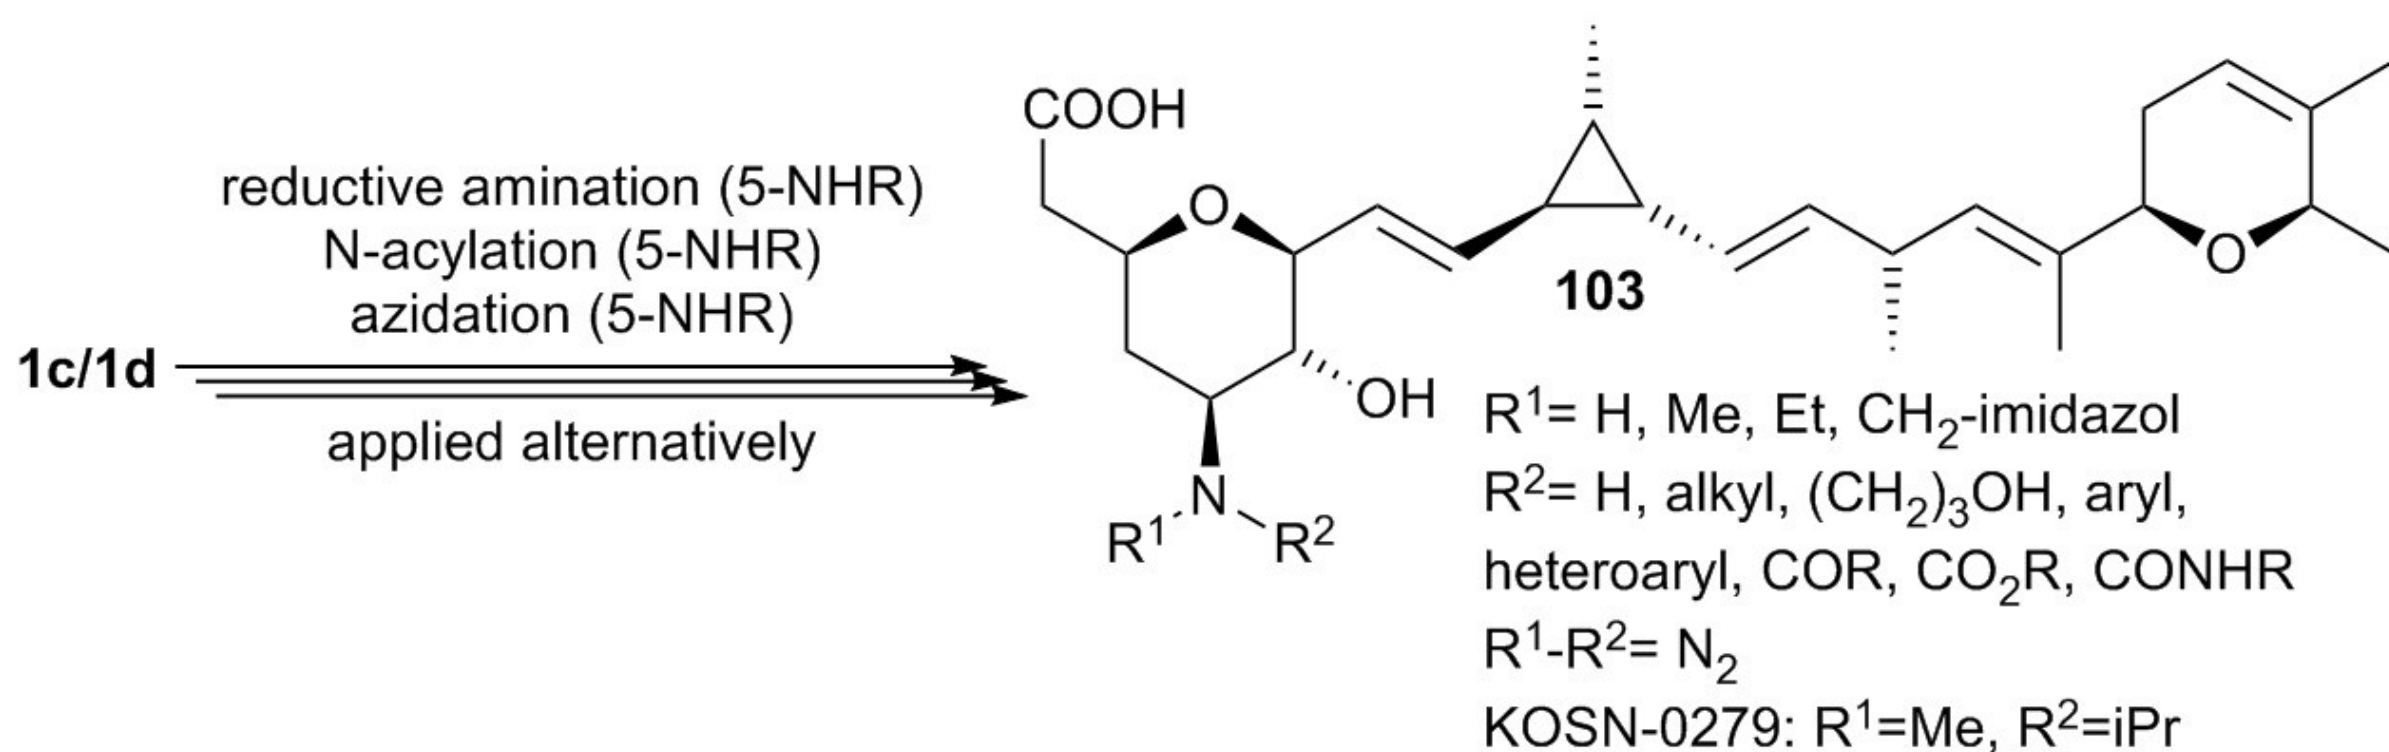

Supplement: d0np00012d8.pdf [file d0np00012d8.pdf]

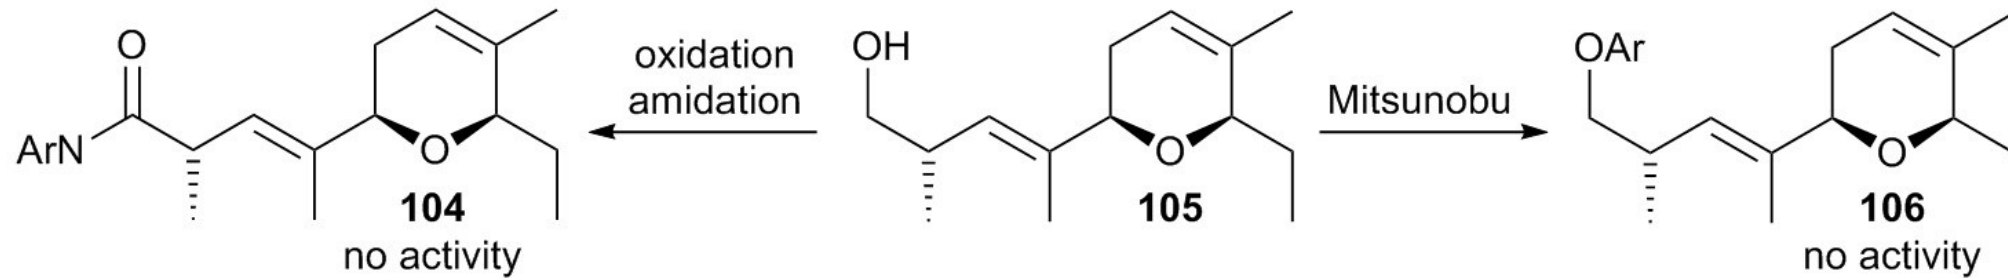

Supplement: d0np00012d9.pdf [file d0np00012d9.pdf]
